# Supplementary material
Source: Springer Nature journal article supplement (https://www.springermedizin.de/resource/supplementary/13049_2013_739_MOESM4_ESM.pdf/9667198)

**A**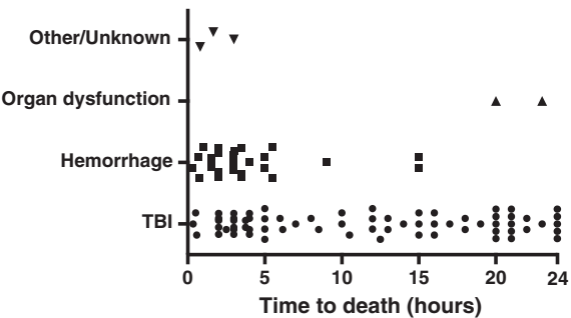**B**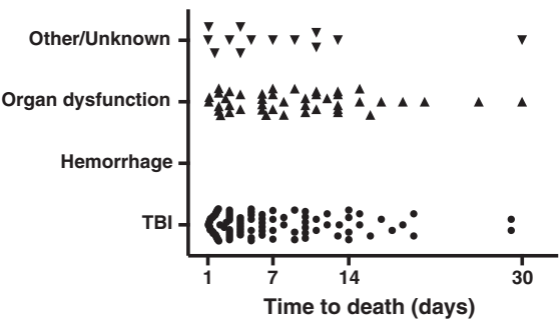

Supplement: MOESM4 [file 9667198]
